# Supplementary material for: A phylogenetic method to perform genome-wide association studies in microbes that accounts for population structure and recombination
Source: PubMed Central journal article supplement (PMC5814097; doi:10.1371/journal.pcbi.1005958), 2018-02-05
Supplement: pcbi.1005958.s003.pdf [file pcbi.1005958.s003.pdf]

### S3 Appendix. Derivation of Score 3.

The correlation score,  $C_x$ , can be described in terms of two components,  $P_x$  and  $G_x$ , representing, respectively, the probability of the value of the phenotype and genotype at a point  $x$  on a branch of length  $l$ . These probabilities are identified using a linear interpolation between the known or reconstructed states at the ancestral and descendant nodes of the branch.

$$P_x = \frac{1}{l}(p_i^{anc}(l-x) + p_i^{des}x) \quad (1)$$

$$G_x = \frac{1}{l}(g_i^{anc}(l-x) + g_i^{des}x) \quad (2)$$

$C_x$  represents the degree of association between phenotype and genotype at point  $x$ .

$$C_x = P_x G_x + (1 - P_x)(1 - G_x) - P_x(1 - G_x) - (1 - P_x)G_x \quad (3)$$

Expanding  $C_x$  to be described in terms of its component parts in full, we get:

$$\begin{aligned} C_x = & \frac{p_i^{anc}(l-x) + p_i^{des}x}{l} \frac{g_i^{anc}(l-x) + g_i^{des}x}{l} + \\ & \left(1 - \frac{p_i^{anc}(l-x) + p_i^{des}x}{l}\right) \frac{g_i^{anc}(l-x) + g_i^{des}x}{l} - \\ & \frac{p_i^{anc}(l-x) + p_i^{des}x}{l} \left(1 - \frac{g_i^{anc}(l-x) + g_i^{des}x}{l}\right) - \\ & \left(1 - \frac{p_i^{anc}(l-x) + p_i^{des}x}{l}\right) \frac{g_i^{anc}(l-x) + g_i^{des}x}{l} \end{aligned} \quad (4)$$

Score 3 is defined as the absolute sum for all branches  $i$  of the integral of  $C_x$ , when the point  $x$  takes positions along the branch  $i$ , that is, when  $x$  is between 0 and  $l_i$ :

$$\text{Score 3} = \left| \sum_{i=1}^{n_b} \int_0^{l_i} C_x dx \right| \quad (5)$$

The integral can be solved mathematically, resulting in the following equation:

$$\begin{aligned} \text{Score 3} = & \left| \sum_{i=1}^{n_b} (-1 + 2p_i^{anc})(-1 + 2g_i^{anc})l_i - \right. \\ & (-p_i^{anc} + p_i^{des} - g_i^{anc} + 4p_i^{anc}g_i^{anc} - \\ & 2p_i^{des}g_i^{anc} + g_i^{des} - 2p_i^{anc}g_i^{des})l_i + \\ & \left. \frac{4}{3}(p_i^{anc} - p_i^{des})(g_i^{anc} - g_i^{des})l_i \right| \end{aligned} \quad (6)$$

Simplifying this results in the final equation for Score 3, which is calculated across all branches of the tree and for each variable site:

$$\begin{aligned} \text{Score 3} = & \left| \sum_{i=1}^{n_b} l \frac{4}{3} p_i^{anc} g_i^{anc} + \frac{2}{3} p_i^{anc} g_i^{des} + \frac{2}{3} p_i^{des} g_i^{anc} + \frac{4}{3} p_i^{des} g_i^{des} \right. \\ & \left. - p_i^{anc} - p_i^{des} - g_i^{anc} - g_i^{des} + 1 \right| \end{aligned} \quad (7)$$

Experimental validation on simulated data indicates that the performance of Score 3 is improved by removing the branch length term,  $l$ , resulting in the final equation for Score 3, which gives all edges equal weight.

To design an optimal third score, we explored whether Score 3 would give better results with the branch length term,  $l_i$ , excluded or included. For all simulated datasets ( $N = 80$ ), we repeated the calculation of Score 3, without branch length (Score3<sub>NoBL</sub>) and with branch length (Score3<sub>BL</sub>). We then ran a two-sample Wilcoxon rank sum test on matched pairs of our four performance statistics under the two conditions. The results are presented in the table below. Rows containing a significant p-value ( $p < 0.05$ ) are highlighted in yellow.

**Wilcoxon test: Score 3 branch length**

|   | Statistic   | P-value | $\Delta$ (Score3 <sub>NoBL</sub> - Score3 <sub>BL</sub> ) |         |           |
|---|-------------|---------|-----------------------------------------------------------|---------|-----------|
|   |             |         | C.I.Lower                                                 | Median  | C.I.Upper |
| 1 | F1.score    | 0.0147  | 0.0123                                                    | 0.1041  | 0.1628    |
| 2 | PPV         | 0.5261  | -0.3214                                                   | -0.0461 | 0.1917    |
| 3 | sensitivity | 0.0137  | 0.0001                                                    | 0.1000  | 0.2000    |
| 4 | FPR         | 0.2986  | 0.0000                                                    | 0.0000  | 0.0001    |
