# Supplementary material for: A phylogenetic method to perform genome-wide association studies in microbes that accounts for population structure and recombination
Source: PubMed Central journal article supplement (PMC5814097; doi:10.1371/journal.pcbi.1005958), 2018-02-05

(a)

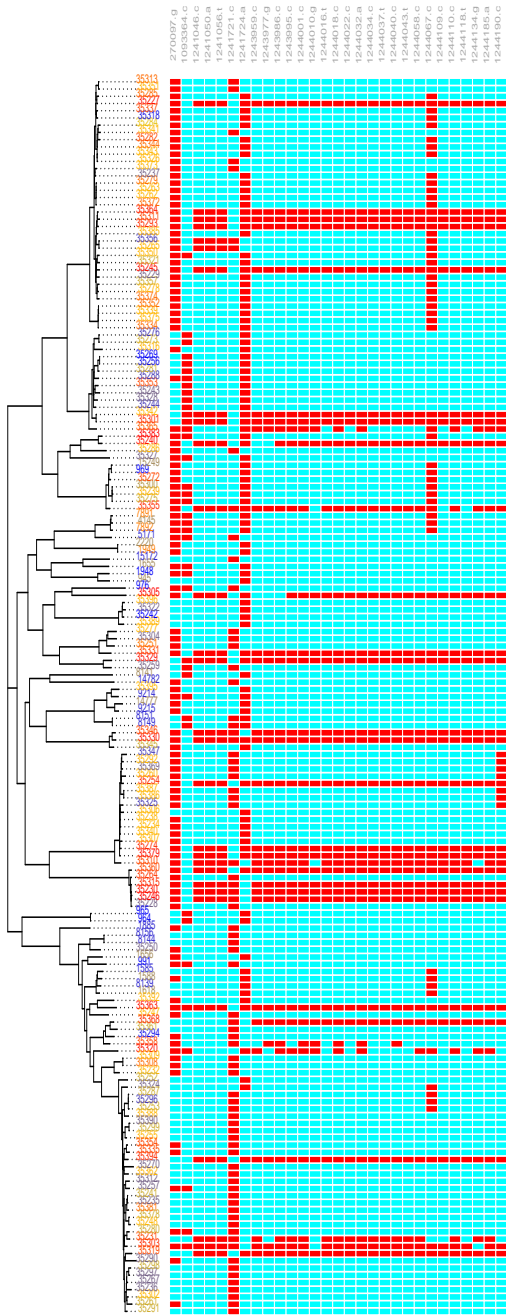

(b)

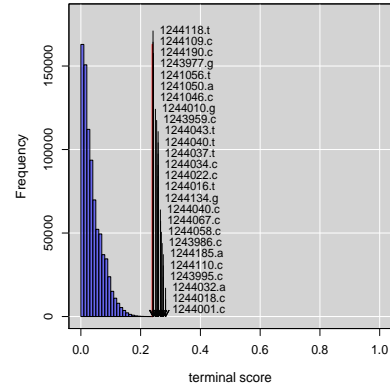

(e)

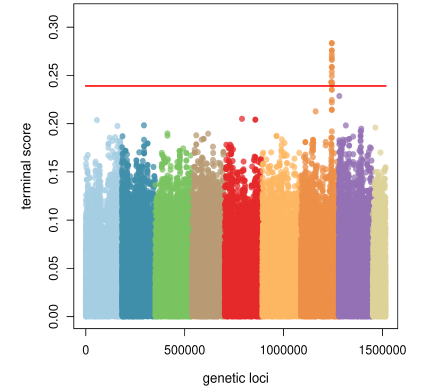

(c)

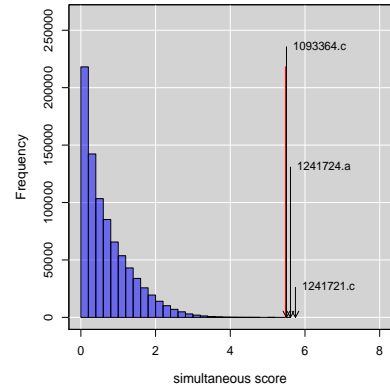

(f)

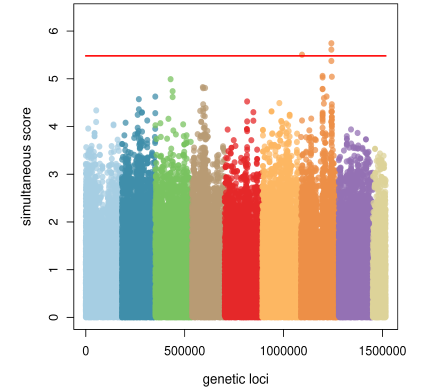

(d)

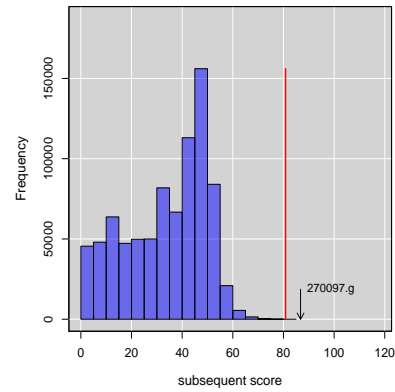

(g)

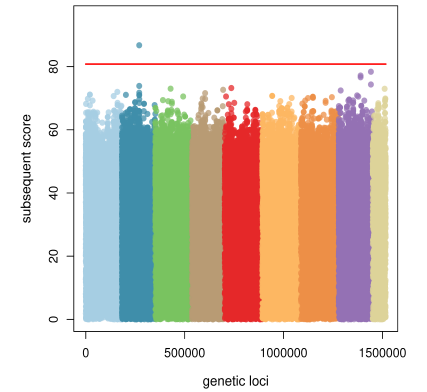

Supplement: pcbi.1005958.s011.pdf [file pcbi.1005958.s011.pdf]
