# Supplementary material for: A phylogenetic method to perform genome-wide association studies in microbes that accounts for population structure and recombination
Source: PLoS Comput Biol. 2018 Feb 5;14(2):e1005958. doi: 10.1371/journal.pcbi.1005958 (PMC5814097; doi:10.1371/journal.pcbi.1005958)
Supplement: S2 File — These loci were identified as significantly associated with the continuous ranked penicillin MIC phenotype, when treeWAS was applied to a dataset of 171 core SNPs extracted from serogroup B Neisseria meningitidis whole-genome sequences. (XLS) [file pcbi.1005958.s013.xls]

## Sheet: S2_File
SNP.locus	terminal	simultaneous	subsquent	locus	gene ID	gene product
123261.c	x	x		1241046	NEIS1753 (penA)	penicillin-binding protein 2
123262.c	x			1241048	NEIS1753 (penA)	penicillin-binding protein 2
123263.a	x	x		1241050	NEIS1753 (penA)	penicillin-binding protein 2
123263.c	x			1241050	NEIS1753 (penA)	penicillin-binding protein 2
123266.t	x	x		1241056	NEIS1753 (penA)	penicillin-binding protein 2
123278.a	x			1241135	NEIS1753 (penA)	penicillin-binding protein 2
123278.c	x			1241135	NEIS1753 (penA)	penicillin-binding protein 2
123279.g	x			1241146	NEIS1753 (penA)	penicillin-binding protein 2
123280.a		x		1241154	NEIS1753 (penA)	penicillin-binding protein 2
123280.c		x		1241154	NEIS1753 (penA)	penicillin-binding protein 2
123287.c	x			1241172	NEIS1753 (penA)	penicillin-binding protein 2
123305.c	x			1241259	NEIS1753 (penA)	penicillin-binding protein 2
123313.a	x	x		1241289	NEIS1753 (penA)	penicillin-binding protein 2
123319.a	x			1241321	NEIS1753 (penA)	penicillin-binding protein 2
123325.a	x			1241349	NEIS1753 (penA)	penicillin-binding protein 2
123325.t	x			1241349	NEIS1753 (penA)	penicillin-binding protein 2
123326.c	x			1241370	NEIS1753 (penA)	penicillin-binding protein 2
123328.a	x			1241388	NEIS1753 (penA)	penicillin-binding protein 2
123329.t	x	x		1241391	NEIS1753 (penA)	penicillin-binding protein 2
123332.g	x	x		1241422	NEIS1753 (penA)	penicillin-binding protein 2
123335.t	x			1241451	NEIS1753 (penA)	penicillin-binding protein 2
123336.a	x			1241454	NEIS1753 (penA)	penicillin-binding protein 2
123340.t	x	x		1241472	NEIS1753 (penA)	penicillin-binding protein 2
123341.a	x	x		1241478	NEIS1753 (penA)	penicillin-binding protein 2
123344.t	x			1241520	NEIS1753 (penA)	penicillin-binding protein 2
123345.a	x			1241522	NEIS1753 (penA)	penicillin-binding protein 2
123346.a	x			1241523	NEIS1753 (penA)	penicillin-binding protein 2
123348.c	x			1241529	NEIS1753 (penA)	penicillin-binding protein 2
123352.c	x			1241589	NEIS1753 (penA)	penicillin-binding protein 2
123354.a	x			1241595	NEIS1753 (penA)	penicillin-binding protein 2
123355.c	x			1241598	NEIS1753 (penA)	penicillin-binding protein 2
123356.c	x			1241599	NEIS1753 (penA)	penicillin-binding protein 2
123360.c	x			1241625	NEIS1753 (penA)	penicillin-binding protein 2
123362.c	x			1241637	NEIS1753 (penA)	penicillin-binding protein 2
123366.c	x			1241670	NEIS1753 (penA)	penicillin-binding protein 2
123427.c	x			1241958	NEIS1753 (penA)	penicillin-binding protein 2
123618.a	x			1243506	NEIS1753 (penA)	penicillin-binding protein 2
123619.t	x			1243510	NEIS1753 (penA)	penicillin-binding protein 2
123622.c	x			1243515	NEIS1753 (penA)	penicillin-binding protein 2
123625.c	x			1243542	NEIS1753 (penA)	penicillin-binding protein 2
123628.g	x	x		1243575	NEIS1753 (penA)	penicillin-binding protein 2
123629.c	x			1243581	NEIS1753 (penA)	penicillin-binding protein 2
123630.c	x			1243587	NEIS1753 (penA)	penicillin-binding protein 2
123632.g	x			1243605	NEIS1753 (penA)	penicillin-binding protein 2
123634.t	x	x		1243608	NEIS1753 (penA)	penicillin-binding protein 2
123635.g	x	x		1243612	NEIS1753 (penA)	penicillin-binding protein 2
123637.g	x	x		1243615	NEIS1753 (penA)	penicillin-binding protein 2
123639.c	x	x		1243617	NEIS1753 (penA)	penicillin-binding protein 2
123642.c	x	x		1243635	NEIS1753 (penA)	penicillin-binding protein 2
123647.g	x			1243644	NEIS1753 (penA)	penicillin-binding protein 2
123650.c	x	x		1243668	NEIS1753 (penA)	penicillin-binding protein 2
123651.g	x	x		1243671	NEIS1753 (penA)	penicillin-binding protein 2
123654.c	x	x		1243683	NEIS1753 (penA)	penicillin-binding protein 2
123655.c	x	x		1243688	NEIS1753 (penA)	penicillin-binding protein 2
123657.a	x	x		1243692	NEIS1753 (penA)	penicillin-binding protein 2
123658.t	x	x		1243695	NEIS1753 (penA)	penicillin-binding protein 2
123659.t	x	x		1243696	NEIS1753 (penA)	penicillin-binding protein 2
123661.a	x	x		1243702	NEIS1753 (penA)	penicillin-binding protein 2
123662.a	x	x		1243704	NEIS1753 (penA)	penicillin-binding protein 2
123662.c	x			1243704	NEIS1753 (penA)	penicillin-binding protein 2
123665.c	x	x		1243713	NEIS1753 (penA)	penicillin-binding protein 2
123666.g	x	x		1243715	NEIS1753 (penA)	penicillin-binding protein 2
123667.g	x	x		1243716	NEIS1753 (penA)	penicillin-binding protein 2
123678.c	x			1243774	NEIS1753 (penA)	penicillin-binding protein 2
123680.c	x	x		1243788	NEIS1753 (penA)	penicillin-binding protein 2
123680.t	x			1243788	NEIS1753 (penA)	penicillin-binding protein 2
123682.c	x			1243797	NEIS1753 (penA)	penicillin-binding protein 2
123683.c	x			1243799	NEIS1753 (penA)	penicillin-binding protein 2
123684.a	x			1243800	NEIS1753 (penA)	penicillin-binding protein 2
123684.c	x			1243800	NEIS1753 (penA)	penicillin-binding protein 2
123685.c	x			1243801	NEIS1753 (penA)	penicillin-binding protein 2
123686.c	x			1243806	NEIS1753 (penA)	penicillin-binding protein 2
123686.g	x			1243806	NEIS1753 (penA)	penicillin-binding protein 2
123687.c	x			1243809	NEIS1753 (penA)	penicillin-binding protein 2
123689.t	x			1243817	NEIS1753 (penA)	penicillin-binding protein 2
123690.t	x			1243818	NEIS1753 (penA)	penicillin-binding protein 2
123692.c	x			1243822	NEIS1753 (penA)	penicillin-binding protein 2
123696.g	x			1243845	NEIS1753 (penA)	penicillin-binding protein 2
123697.g	x			1243848	NEIS1753 (penA)	penicillin-binding protein 2
123698.c	x			1243854	NEIS1753 (penA)	penicillin-binding protein 2
123698.g	x			1243854	NEIS1753 (penA)	penicillin-binding protein 2
123699.g	x			1243857	NEIS1753 (penA)	penicillin-binding protein 2
123700.c	x			1243858	NEIS1753 (penA)	penicillin-binding protein 2
123701.a	x			1243866	NEIS1753 (penA)	penicillin-binding protein 2
123702.c	x			1243869	NEIS1753 (penA)	penicillin-binding protein 2
123703.a	x			1243870	NEIS1753 (penA)	penicillin-binding protein 2
123704.a	x			1243872	NEIS1753 (penA)	penicillin-binding protein 2
123704.c	x			1243872	NEIS1753 (penA)	penicillin-binding protein 2
123705.t	x			1243873	NEIS1753 (penA)	penicillin-binding protein 2
123707.a	x	x		1243880	NEIS1753 (penA)	penicillin-binding protein 2
123708.a	x			1243881	NEIS1753 (penA)	penicillin-binding protein 2
123709.g	x			1243884	NEIS1753 (penA)	penicillin-binding protein 2
123710.c	x			1243887	NEIS1753 (penA)	penicillin-binding protein 2
123711.g	x			1243890	NEIS1753 (penA)	penicillin-binding protein 2
123712.c	x			1243891	NEIS1753 (penA)	penicillin-binding protein 2
123713.g	x			1243892	NEIS1753 (penA)	penicillin-binding protein 2
123714.a	x			1243893	NEIS1753 (penA)	penicillin-binding protein 2
123714.c	x	x		1243893	NEIS1753 (penA)	penicillin-binding protein 2
123715.a	x			1243894	NEIS1753 (penA)	penicillin-binding protein 2
123715.g	x	x		1243894	NEIS1753 (penA)	penicillin-binding protein 2
123716.g	x			1243896	NEIS1753 (penA)	penicillin-binding protein 2
123717.a	x	x		1243899	NEIS1753 (penA)	penicillin-binding protein 2
123718.c	x			1243902	NEIS1753 (penA)	penicillin-binding protein 2
123719.a	x	x		1243903	NEIS1753 (penA)	penicillin-binding protein 2
123720.t	x	x		1243905	NEIS1753 (penA)	penicillin-binding protein 2
123721.c	x	x		1243906	NEIS1753 (penA)	penicillin-binding protein 2
123723.t	x			1243920	NEIS1753 (penA)	penicillin-binding protein 2
123724.c	x			1243923	NEIS1753 (penA)	penicillin-binding protein 2
123725.g	x	x		1243926	NEIS1753 (penA)	penicillin-binding protein 2
123726.c	x			1243927	NEIS1753 (penA)	penicillin-binding protein 2
123727.c	x			1243929	NEIS1753 (penA)	penicillin-binding protein 2
123727.g	x	x		1243929	NEIS1753 (penA)	penicillin-binding protein 2
123729.c	x	x		1243935	NEIS1753 (penA)	penicillin-binding protein 2
123731.g	x			1243944	NEIS1753 (penA)	penicillin-binding protein 2
123732.c	x			1243947	NEIS1753 (penA)	penicillin-binding protein 2
123732.g	x			1243947	NEIS1753 (penA)	penicillin-binding protein 2
123734.g	x			1243953	NEIS1753 (penA)	penicillin-binding protein 2
123735.g	x	x		1243956	NEIS1753 (penA)	penicillin-binding protein 2
123736.c	x	x		1243959	NEIS1753 (penA)	penicillin-binding protein 2
123737.t	x	x		1243968	NEIS1753 (penA)	penicillin-binding protein 2
123740.a	x	x		1243977	NEIS1753 (penA)	penicillin-binding protein 2
123740.g	x	x		1243977	NEIS1753 (penA)	penicillin-binding protein 2
123741.c	x	x		1243986	NEIS1753 (penA)	penicillin-binding protein 2
123743.c	x	x		1243995	NEIS1753 (penA)	penicillin-binding protein 2
123746.c	x	x		1244001	NEIS1753 (penA)	penicillin-binding protein 2
123747.c	x	x		1244004	NEIS1753 (penA)	penicillin-binding protein 2
123749.a	x			1244010	NEIS1753 (penA)	penicillin-binding protein 2
123749.g	x	x		1244010	NEIS1753 (penA)	penicillin-binding protein 2
123749.t	x			1244010	NEIS1753 (penA)	penicillin-binding protein 2
123751.a	x			1244013	NEIS1753 (penA)	penicillin-binding protein 2
123751.t	x			1244013	NEIS1753 (penA)	penicillin-binding protein 2
123752.t	x	x	x	1244016	NEIS1753 (penA)	penicillin-binding protein 2
123753.c	x	x		1244018	NEIS1753 (penA)	penicillin-binding protein 2
123755.c	x	x	x	1244022	NEIS1753 (penA)	penicillin-binding protein 2
123756.a	x			1244023	NEIS1753 (penA)	penicillin-binding protein 2
123757.a	x	x		1244032	NEIS1753 (penA)	penicillin-binding protein 2
123758.c	x	x	x	1244034	NEIS1753 (penA)	penicillin-binding protein 2
123760.t	x	x	x	1244037	NEIS1753 (penA)	penicillin-binding protein 2
123761.c	x	x	x	1244040	NEIS1753 (penA)	penicillin-binding protein 2
123761.t	x	x	x	1244040	NEIS1753 (penA)	penicillin-binding protein 2
123762.t	x	x	x	1244043	NEIS1753 (penA)	penicillin-binding protein 2
123764.c	x	x	x	1244058	NEIS1753 (penA)	penicillin-binding protein 2
123764.g	x	x		1244058	NEIS1753 (penA)	penicillin-binding protein 2
123765.c	x			1244061	NEIS1753 (penA)	penicillin-binding protein 2
123766.c		x		1244067	NEIS1753 (penA)	penicillin-binding protein 2
123767.c	x			1244070	NEIS1753 (penA)	penicillin-binding protein 2
123767.g	x			1244070	NEIS1753 (penA)	penicillin-binding protein 2
123772.c	x	x		1244094	NEIS1753 (penA)	penicillin-binding protein 2
123772.t	x	x		1244094	NEIS1753 (penA)	penicillin-binding protein 2
123776.c	x	x		1244109	NEIS1753 (penA)	penicillin-binding protein 2
123777.c	x	x		1244110	NEIS1753 (penA)	penicillin-binding protein 2
123779.t	x	x		1244118	NEIS1753 (penA)	penicillin-binding protein 2
123780.g	x	x		1244134	NEIS1753 (penA)	penicillin-binding protein 2
123782.t	x			1244139	NEIS1753 (penA)	penicillin-binding protein 2
123783.c	x			1244143	NEIS1753 (penA)	penicillin-binding protein 2
123784.c	x			1244144	NEIS1753 (penA)	penicillin-binding protein 2
123785.a	x			1244152	NEIS1753 (penA)	penicillin-binding protein 2
123786.a	x			1244155	NEIS1753 (penA)	penicillin-binding protein 2
123788.c	x			1244163	NEIS1753 (penA)	penicillin-binding protein 2
123789.c	x			1244166	NEIS1753 (penA)	penicillin-binding protein 2
123791.a	x	x		1244185	NEIS1753 (penA)	penicillin-binding protein 2
123792.c	x	x		1244190	NEIS1753 (penA)	penicillin-binding protein 2
